# Supplementary material
Source: PubMed Central journal article supplement (PMC6988571)
Supplement: NIHMS1539630-supplement-1.pdf [file NIHMS1539630-supplement-1.pdf]

Supplementary Fig. 1

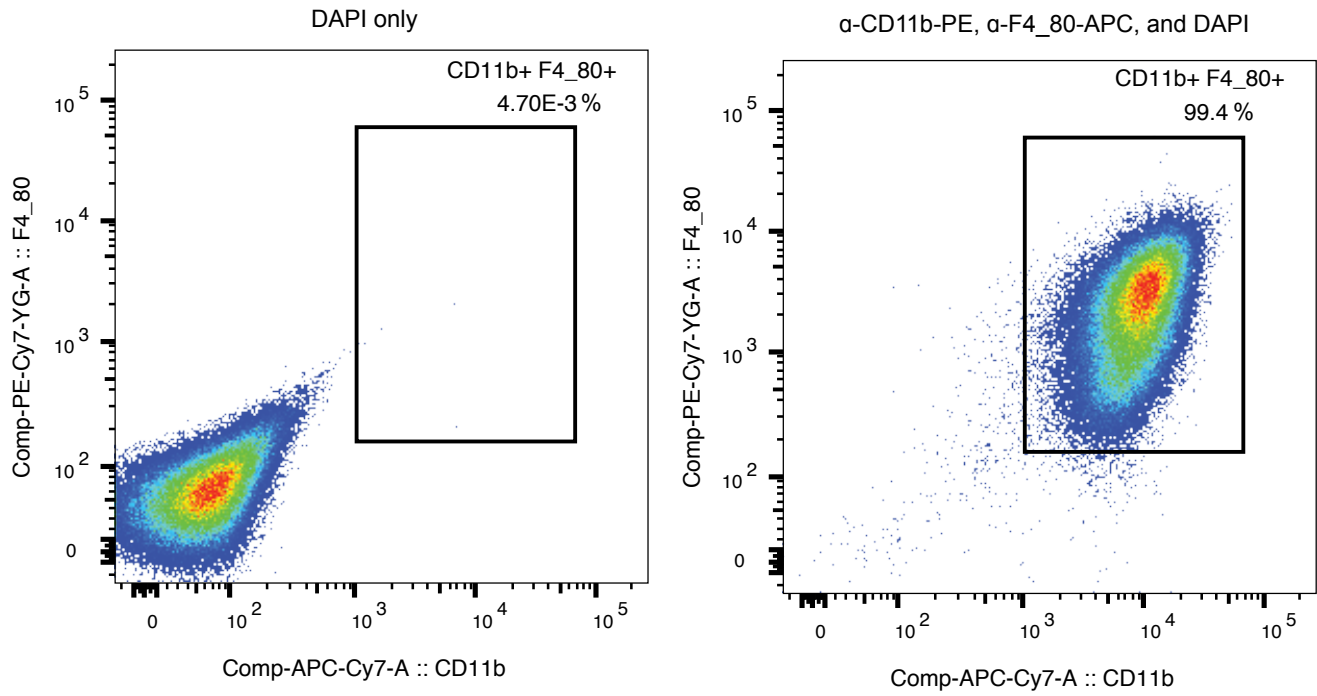

**Supplementary Fig 1. Flow cytometry to phenotypically determine the percentage of CD11b(+)/F4/80(+) macrophages.** Graphs plot fluorescence intensity of F4\_80 (y-axis) and CD11b (x-axis) for (left, negative control) cells stained with DAPI only to label cellular DNA or (right) cells stained with anti-CD11b-PE, anti-F4\_80-APC and DAPI (n = 1).
