# Supplementary material
Source: PubMed Central journal article supplement (PMC6988571)

Scanned unmodified photos of blots used to prepare Fig. 1d:

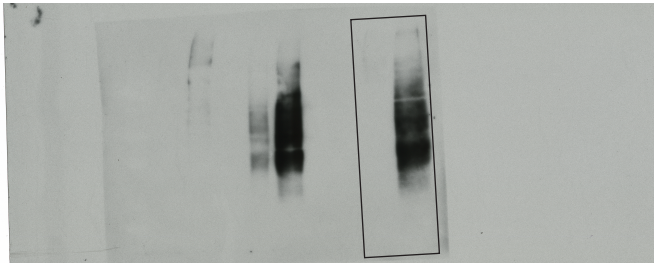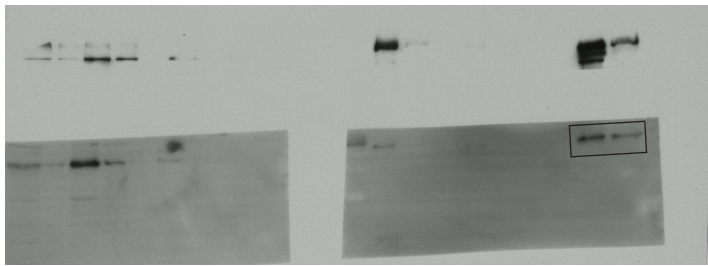

Supplement: NIHMS1539630-supplement-2.pdf [file NIHMS1539630-supplement-2.pdf]
